# Supplementary material for: Characterization of a haplotype-reference panel for genotyping by low-pass sequencing in Swiss Large White pigs
Source: PubMed Central journal article supplement (PMC8061004; doi:10.1186/s12864-021-07610-5), 2021-04-21
Supplement: 12864_2021_7610_MOESM4_ESM.pdf [file 12864_2021_7610_MOESM4_ESM.pdf]

1.5 X

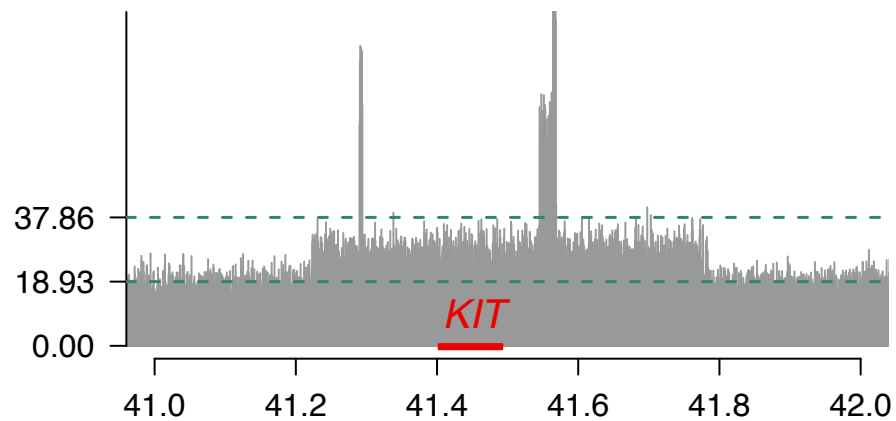

2 X

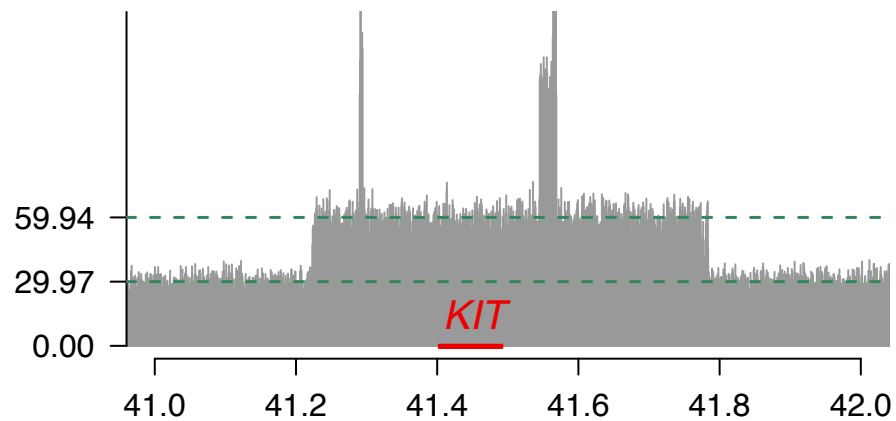

2.5 X

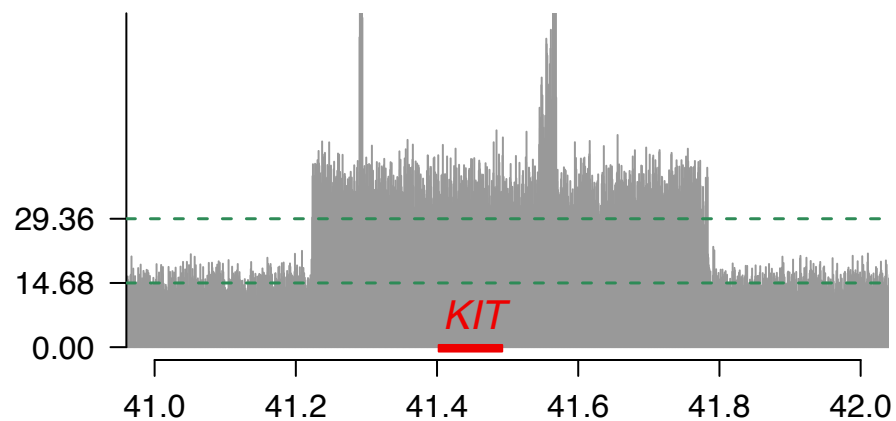

3 X

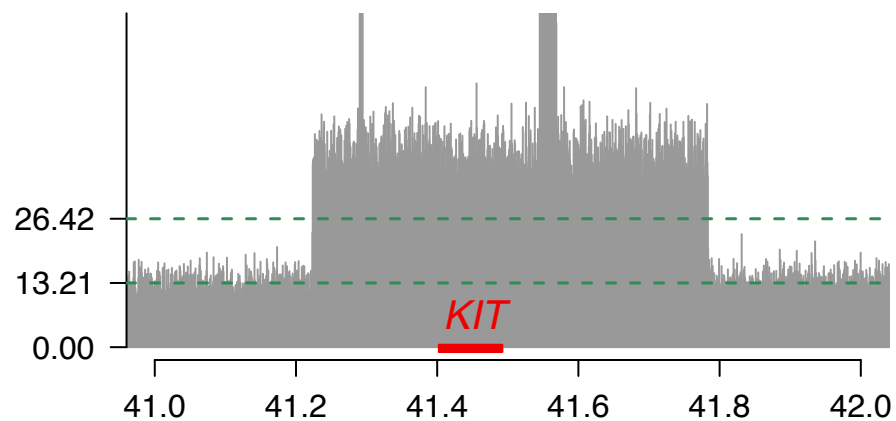

Position in Mb
